# Supplementary material
Source: HighWire-hosted journal article supplement (doi:10.1101/rna.055798.115)
Supplement: Supplemental_Strain_list.docx [file Supplemental_Strain_list.docx]

| Strain | Genotype | Source |
| --- | --- | --- |
| JWY 7771 | MATa ura3-52 trp1-1 lys2-801 his3-∆200 leu2-∆1 rpl7b::KANMX6 | Jakovljevic et al. 2012 |
| JWY8591 | MATa ura3-52 trp1-1 lys2-801 his3-∆200 leu2-∆1 rpf2::RPF2-TAP URA3 rpl8a::KANMX6 rpl8b::GAL-HA3-RPL8B HIS3 | Jakovljevic et al. 2012 |
| JWY9933 | MATa ura3-52 trp1-1 lys2-801 his3-∆200 leu2-∆1 rpf2::RPF2-TAP URA3 rpl8a::KANMX6 rpl8b::GAL-HA3-RPL8B HIS3 pRS315 LEU2 | This study |
| JWY9934 | MATa ura3-52 trp1-1 lys2-801 his3-∆200 leu2-∆1 rpf2::RPF2-TAP URA3 rpl8a::KANMX6 rpl8b::GAL-HA3-RPL8B HIS3 pRS315_L8 LEU2 | This study |
| JWY9935 | MATa ura3-52 trp1-1 lys2-801 his3-∆200 leu2-∆1 rpf2::RPF2-TAP URA3 rpl8a::KANMX6 rpl8b::GAL-HA3-RPL8B HIS3 pRS315_L8Δ1-70 LEU2 | This study |
| JWY9939 | MATa ura3-52 trp1-1 lys2-801 his3-∆200 leu2-∆1 rpf2::RPF2-TAP URA3 rpl8a::KANMX6 rpl8b::GAL-HA3-RPL8B HIS3 pRS315_L8Δ233-256 LEU2 | This study |
| JWY9959 | MATa ura3-52 trp1-1 lys2-801 his3-∆200 leu2-∆1 rpf2::RPF2-TAP URA3 rpl8a::KANMX6 rpl8b::GAL-HA3-RPL8B HIS3 pRS315_L8Δ1-52 LEU2 | This study |
| JWY 10801 | MATa ura3-52 trp1-1 lys2-801 his3-∆200 leu2-∆1 rpl7b::KANMX6 rpl7a::GAL-RPL7A TRP1 | This study |
| JWY10812 | MATa ura3-52 trp1-1 lys2-801 his3-∆200 leu2-∆1 rpl35b::KANMX6 rpl35a::GAL-HA3-RPL35A TRP1 pRS315-L35-myc LEU2 | This study |
| JWY10813 | MATa ura3-52 trp1-1 lys2-801 his3-∆200 leu2-∆1 rpl35b::KANMX6 rpl35a::GAL-HA3-RPL35A TRP1 pRS315_L35Δ70-120-myc LEU2 | This study |
| JWY10814 | MATa ura3-52 trp1-1 lys2-801 his3-∆200 leu2-∆1 rpl35b::KANMX6 rpl35a::GAL-HA3-RPL35A TRP1 pRS315_L35Δ95-120-myc LEU2 | This study |
| JWY10837 | MATa ura3-52 trp1-1 lys2-801 his3-∆200 leu2-∆1 rpl35b::KANMX6 rpl35a::GAL-HA3-RPL35A TRP1 pRS315_L35T93A-myc LEU2 | This study |
| JWY10841 | MATa ura3-52 trp1-1 lys2-801 his3-∆200 leu2-∆1 rpl35b::KANMX6 rpl35a::GAL-HA3-RPL35A TRP1 pRS315_L35K103-107A-myc LEU2 | This study |
| JWY10843 | MATa ura3-52 trp1-1 lys2-801 his3-∆200 leu2-∆1 rpl35b::KANMX6 rpl35a::GAL-HA3-RPL35A TRP1 pRS315_L35Δ95-120-myc LEU2 Nop7-TAP URA3 | This study |
| JWY10845 | MATa ura3-52 trp1-1 lys2-801 his3-∆200 leu2-∆1 rpl35b::KANMX6 rpl35a::GAL-HA3-RPL35A TRP1 pRS315_L35Y116A-myc LEU2 | This study |
| JWY10849 | MATa ura3-52 trp1-1 lys2-801 his3-∆200 leu2-∆1 rpl35b::KANMX6 rpl35a::GAL-HA3-RPL35A TRP1 pRS315_L35I118E-myc LEU2 | This study |
| JWY10853 | MATa ura3-52 trp1-1 lys2-801 his3-∆200 leu2-∆1 rpl7b::KANMX6 rpl7a::GAL-RPL7A TRP1 pRS315_L7-myc LEU2 | This study |
| JWY10854 | MATa ura3-52 trp1-1 lys2-801 his3-∆200 leu2-∆1 rpl7b::KANMX6 rpl7a::GAL-RPL7A TRP1 pRS315_L7∆1-40-myc LEU2 | This study |
| JWY10855 | MATa ura3-52 trp1-1 lys2-801 his3-∆200 leu2-∆1 rpl7b::KANMX6 rpl7a::GAL-RPL7A TRP1 pRS315_L7∆1-55-myc LEU2 | This study |
| JWY10856 | MATa ura3-52 trp1-1 lys2-801 his3-∆200 leu2-∆1 rpl7b::KANMX6 rpl7a::GAL-RPL7A TRP1 pRS315_L7∆1-80-myc LEU2 | This study |
| JWY10857 | MATa ura3-52 trp1-1 lys2-801 his3-∆200 leu2-∆1 rpl7b::KANMX6 rpl7a::GAL-RPL7A TRP1 pRS315_L7V77E-myc LEU2 | This study |
| JWY10859 | MATa ura3-52 trp1-1 lys2-801 his3-∆200 leu2-∆1 rpl7b::KANMX6 rpl7a::GAL-RPL7A TRP1 pRS315_L7-myc LEU2 Rpf2-TAP URA3 | This study |
| JWY10863 | MATa ura3-52 trp1-1 lys2-801 his3-∆200 leu2-∆1 rpl7b::KANMX6 rpl7a::GAL-RPL7A TRP1 pRS315_L7V77E-myc LEU2 Rpf2-TAP URA3 | This study |
| JWY10877 | MATa ura3-52 trp1-1 lys2-801 his3-∆200 leu2-∆1 rpl35b::KANMX6 rpl35a::GAL-HA3-RPL35A TRP1 pRS315 LEU2 | This study |
| JWY10889 | MATa ura3-52 trp1-1 lys2-801 his3-∆200 leu2-∆1 rpf2::RPF2-TAP URA3 rpl8a::KANMX6 rpl8b::GAL-HA3-RPL8B TRP1 Nog2-TAP URA3 | This study |
| JWY10892 | MATa ura3-52 trp1-1 lys2-801 his3-∆200 leu2-∆1 rpf2::RPF2-TAP URA3 rpl8a::KANMX6 rpl8b::GAL-HA3-RPL8B TRP1 Nog2-TAP URA3 pRS315_L8∆1-70 | This study |
| JWY10917 | GAL1-3HA-Sda1 (from D. Kellogg) Nog2-TAP URA3 | This study |
